# Supplementary material for: Transcriptional heterogeneity predicts and enables clonal selection in ageing haematopoiesis
Source: Research Square preprint supplement (doi:10.21203/rs.3.rs-10046174/v1), 2026-06-25
Supplement: Supplementary file 1 [file 52811c1ee9ad90c59d67a1ab.xlsx]

## Sheet: Summary
Sheet	content
ET1	Extended Data Table 1 | Mouse details and aging cohorts.
ET2	Extended Data Table 2 | Experiment 1 sorting and in vitro (Day 0) scRNAseq.
ET3	Extended Data Table 3 | Experiment 1 in vitro (Day 0) sorting for scRNAseq.
ET4	Extended Data Table 4 | Experiment 1 in vivo (Day 60) sorting for scRNAseq.
ET5	Extended Data Table 5 | Experiment 2 sorting and QC.
ET6	Extended Data Table 6 | Experiment 2 in vitro (Day 0) sorting for scRNAseq.
ET7	Extended Data Table 7 | Experiment 2 in vivo (Day 60) sorting for scRNAseq.
ET8	Extended Data Table 8 | Clone-level statistics across aging contexts.
ET9	Extended Data Table 9 | Numbers of differential gene expression associated with clonal output activity.
ET10	Extended Data Table 10 | Gene set and pathway enrichment associated with differential variability programs (Experiment 2).
ET11	Extended Data Table 11 | Gene set and pathway enrichment associated with differential variability programs (shared by Experiment 2 and Unmanipulated datasets).
ET12	Extended Data Table 12 | Overlap of differentially variable genes across mouse and human datasets.
ET13	Extended Data Table 13 | Differentially variable genes in young, middle-aged or old human HSC from dataset GSE189161
ET14	Extended Data Table 14 | Gene set and pathway enrichment associated with differential variability programs (Human_GSE189161).
ET15	Extended Data Table 15 | Clonal self-renewal and clonal fitness index (CFI) metrics of old mice.
ET16	Extended Data Table 16 | Clonal self-renewal and clonal fitness index (CFI) metrics of young mice.
ET17	Extended Data Table 17 | Predictive model features and performance metrics for clonal fitness classification.

## Sheet: ET1
Extended Data Table 1 | Mouse details and aging cohorts
Strain	C57BL/6j
Sex	female
Donor age (all experiments)	Young (Y) = 2 months / Old (O) = 20 months
Host age (all experiments)	Young (Y) = 2.5 months / Old (O) = 20.5 months
Genetic modifications	Lentiviral barcoding
Source	National Institute on Aging mouse repository
Backcrossing information	No backcrossing
Driver mutation / Disease	none

## Sheet: ET2
Extended Data Table 2 | Experiment 1 sorting and in vitro (Day 0) scRNAseq
Initial sort		Day 11 transplantation
		Flow cytometry QC			cells injected per mouse
mouse	HSPC number	% live cells	% HSPC	% EGFP+	live cells	EGFP+ HSPC	Host
Y1A	72000	66.408	12.196	91.8177	178941	17178	Y1B
Y2A	87000	70.6171	16.6507	94.6721	246876	34811	Y2B
Y3A	75000	72.0422	16.566	93.3261	252945	34601	Y3B
O1A	155000	57.4551	38.4237	97.531	345177	117397	O1B
O2A	114000	59.3044	41.5038	97.2573	270221	100247	O2B
O3A	152840	64.8431	40.3535	97.1241	456456	165949	O3B
HSPC =	Lineage- DAPI- Sca+ c-Kit+
EGFP+ HSPC =	Lineage- DAPI- Sca+ c-Kit+ EGFP+

## Sheet: ET3
Extended Data Table 3 | Experiment 1 in vitro (Day 0) sorting for scRNAseq
Day 14 sort for scRNAseq				mix for capture
sample	% live (pre-sort)	EGFP+ HSPC	EGFP+ non HSPC	EGFP+ HSPC	EGFP+ non HSPC	library
Y1A	80.03	5849	86415	5849	5849	Y1A
Y2A	82.04	7243	106767	7243	7243	Y2A
Y3A	83.98	8044	111861	8044	8044	Y3A
O1A	72.03	26914	137526	26914	26914	O1A
O2A	75.09	30391	136155	30391	30391	O2A
O3A	74.65	37786	151536	37786	37786	O3A
EGFP+ HSPC	Lineage- DAPI- Sca+ c-Kit+ EGFP+
EGFP+ non-HSPC	Lineage- DAPI- Sca- EGFP+

## Sheet: ET4
Extended Data Table 4 | Experiment 1 in vivo (Day 60) sorting for scRNAseq
Day 14 sort for scRNAseq					mix for capture
sample	% live (pre-sort)	EGFP1	EGFP2	EGFP3	EGFP1	EGFP2	EGFP3	library
Y1B	75.22	2730	82000	171000	2730	3635	3635	Y1B
Y2B	78.2	3600	166000	200000	3600	3600	3600	Y2B
Y3B	84.42	5200	113000	200000	5200	5200	5200	Y3B
O1B	84.02	10000	160000	200000	10000	10000	10000	O1B
O2B	79.61	10000	76000	200000	10000	10000	10000	O2B
O3B	83.32	10000	137000	200000	10000	10000	10000	O3B
EGFP1 =	Lineage- DAPI- Sca+ c-Kit+ EGFP+
EGFP2 =	Lineage- DAPI- Sca- EGFP+
EGFP3 =	Lineage+ DAPI- EGFP+

## Sheet: ET5
Extended Data Table 5 | Experiment 2 sorting and QC
Initial sort		Day 11 transplantation
		Flow Cytometry QC			Pool of cells injected per mouse
mouse	HSPC number	% live cells	% HSPC	% EGFP+	live cells	EGFP+ HSPC	Hosts
Y1	24450	67.09	19.49	73.0306	380000	50224	YY1 / YO1
Y2	30665	62.52	22.68	69.5817			YY2 / YO2
Y3	35273	67.08	19.93	69.7188			YY3 / YO3
O1	75762	58.01	21.41	73.39	1198333	256037	OO1 / OY1
O2	121455	58	37.68	77.5743			OO2 / OY2
O3	132790	68.89	35.47	76.0016			OO3 / OY3
HSPC =	Lineage- DAPI- Sca+ c-Kit+ CD48-
EGFP+ HSC =	Lineage- DAPI- Sca+ c-Kit+ EGFP+

## Sheet: ET6
Extended Data Table 6 | Experiment 2 in vitro (Day 0) sorting for scRNAseq
Day 15 sort for scRNAseq				mix for capture
sample	% live (pre-sort)	EGFP+ HSC	EGFP+ MPP	EGFP+ HSC	EGFP+ MPP	Hashing antibody	Library
Y1	79.6	6735	15803	6735	13470	B0301	Y Day0
Y2	76.75	6056	12180	6056	12112	B0302
Y3	75.89	7092	20306	7092	14184	B0303
O1	79.8	8739	22738	8739	8739	B0301	O Day0
O2	67.99	18323	19906	18323	18323	B0302
O3	76.63	19182	23195	19182	19182	B0303
EGFP+ HSC	DAPI- Lineage- Sca+ c-Kit+ EPCR+ CD150+ EGFP+
MPP	DAPI- Lineage- Sca+ c-Kit+ EGFP+ other than EPCR+ CD150+
Hashing barcodes	B0301	ACCCACCAGTAAGAC
	B0302	GGTCGAGAGCATTCA
	B0303	CTTGCCGCATGTCAT

## Sheet: ET7
Extended Data Table 7 | Experiment 2 in vivo (Day 60 ) sorting for scRNAseq
Day 14 sort for scRNAseq
sample	% lineage-/live (pre-sort)*	EGFP+ HSPC	Hashing antibody	Library
YY1	17.09	7051	B0301	YY
YY2	20.08	5440	B0302
YY3	19.44	9170	B0303
YO1	13.75	8006	B0301	YO
YO2	13.81	2230	B0302
YO3	15.44	8005	B0303
OO1	17.14	33582	B0301	OO
OO2	21.41	24478	B0302
OO3	26.35	16079	B0303
OY1	18.44	8005	B0301	OY
OY2	15.24	8014	B0302
OY3	16.74	8012	B0303
EGFP+ HSPC	Lineage- NearIR Dead- Sca+ c-Kit+ EGFP+
* lineage+ and dead cells were simultaneously gated in the same channel
Hashing barcodes	B0301	ACCCACCAGTAAGAC
	B0302	GGTCGAGAGCATTCA
	B0303	CTTGCCGCATGTCAT

## Sheet: ET8
Extended Data Table 8 | Clone-level statistics across aging contexts.
Data	Donor/host	Clone number	HSC cells	HSPC cells	Clone Size
Exp1 in vitro	O	2068	1862	2815	4627
	Y	2168	2231	3441	6786
Exp1 in vivo	OO	976	1103	1366	6648
	YY	363	1365	1651	8170
Exp 2 in vitro	O	1116	1250	1367	1636
	Y	1376	2075	3123	4120
Exp 2 in vivo	OO	879	992	2694	3447
	OY	272	181	415	602
	YO	226	376	1055	1631
	YY	269	523	1284	1542

## Sheet: ET9
Extended Data Table 9 | Numbers of differential gene expression associated with clonal output activity.
Sample	n_HighOA DEG	n_LowOA DEG	LowOA DEG overlap
Exp1_O_D0	437	725	18
Exp1_OO_D60	465	56
Exp1_Y_D0	375	671	35
Exp1_YY_D60	357	112
Exp2_OO_D60	610	457	11
Exp2_O_D0	33	46
Exp2_YY_D60	622	459	188
Exp2_Y_D0	96	686

[truncated: 8 more sheets: ET10, ET11, ET12, ET13, ET14, ET15, ET16, ET17]
